# Supplementary material for: N123I mutation in the ALV-J receptor-binding domain region enhances viral replication ability by increasing the binding affinity with chNHE1
Source: PubMed Central journal article supplement (PMC10878525; doi:10.1371/journal.ppat.1011928), 2024-02-07
Supplement: ppat.1011928.s001.pdf [file ppat.1011928.s001.pdf]

**S1 Table. The ALV-J strains were used in the study.**

| Strains    | Origin       | Host    | Accession no | Strains    | Origin    | Host    | Accession no |
|------------|--------------|---------|--------------|------------|-----------|---------|--------------|
| BR119      | Shandong     | layer   | KF562373     | UD4        | USA       | broiler | AF307951     |
| HB201101   | Hebei        | layer   | MW476816     | UD5        | USA       | broiler | AF307952     |
| CAUHM01    | Beijing      | layer   | HM640944     | YZ9902     | Jiangsu   | broiler | HM235670     |
| CAUSY01    | Beijing      | layer   | HM640944     | GD06SL1    | Guangdong | local   | EF107624     |
| CAUXT01    | Beijing      | layer   | HM640947     | GD06SL2    | Guangdong | local   | EF103129     |
| CAUYL01    | Beijing      | layer   | HM640948     | GD06SL3    | Guangdong | local   | EF103130     |
| GD1109     | Guangdong    | layer   | JX254901     | GD06SL4    | Guangdong | local   | EF103131     |
| GDHN-YH1   | Guangdong    | layer   | MK683480     | GD1406-H   | Guangdong | local   | KU500033     |
| HAY013     | Jiangsu      | layer   | HM235665     | GD1407-L   | Guangdong | local   | KU500034     |
| HB201102-1 | Hebei        | layer   | MW476819     | GD1408-2   | Guangdong | local   | KU500037     |
| HB2020     | Hubei        | layer   | ON840093     | GD14J2     | Guangdong | local   | KU500032     |
| HLJ09MDJ-1 | Heilongjiang | layer   | JN624880     | GD15MM01   | Guangxi   | local   | MN066152     |
| HLJ09SH01  | Heilongjiang | layer   | HQ634806     | GD19GZ02   | Guangdong | local   | MN893851     |
| HLJ09SH02  | Heilongjiang | layer   | HQ634807     | GDQY1201   | Guangdong | local   | JX423792     |
| HLJ13SH01  | Heilongjiang | layer   | KM376510     | GDYH-B1    | Guangdong | local   | MK940585     |
| HN1001-3   | Henan        | layer   | HQ260976     | GX14HG01   | Guangxi   | local   | KU997685     |
| HUB09WH03  | Hubei        | layer   | HQ634805     | GX14HG04   | Guangxi   | local   | KX058878     |
| JL08CH3-1  | Jilin        | layer   | HQ634809     | GX14LT07   | Guangxi   | local   | KX034517     |
| JL093-1    | Jilin        | layer   | JN624878     | GX14NN01   | Guangxi   | local   | MN066154     |
| JL10HW01   | Jilin        | layer   | HQ634800     | GX14YL03   | Guangxi   | local   | KR025484     |
| JL10HW02   | Jilin        | layer   | HQ634801     | GX15JL01   | Guangxi   | local   | MN735294     |
| JS09GY2    | Jiangsu      | layer   | GU982307     | GX15MM61   | Guangxi   | local   | MN066150     |
| JS09GY3    | Jiangsu      | layer   | GU982308     | GX15MM6-2  | Guangxi   | local   | KU934276     |
| JS09GY5    | Jiangsu      | layer   | GU982309     | GX16MM92   | Guangxi   | local   | MN066149     |
| JS09GY6    | Jiangsu      | layer   | GU982310     | GX16NN04   | Guangxi   | local   | MN735296     |
| LN08SY10   | Liaoning     | layer   | HQ634802     | GX16YL01   | Guangxi   | local   | MN735297     |
| LN09SY31   | Liaoning     | layer   | HQ634803     | GX16YL02   | Guangxi   | local   | MN066147     |
| SCDY1      | Sichuan      | layer   | HQ425636     | GX16ZS01   | Guangxi   | local   | KY983549     |
| SD09DP03   | Shandong     | layer   | JN624879     | GX17NN05   | Guangxi   | local   | MN066145     |
| SD09DP04   | Shandong     | layer   | HQ634808     | GX17YL01   | Guangxi   | local   | MN066143     |
| SD100501J  | Shandong     | layer   | HQ270189     | GX17YL101J | Guangxi   | local   | MZ393159     |
| SD100502J  | Shandong     | layer   | HQ270188     | GX18NN02   | Guangxi   | local   | MN066140     |
| SD1009     | Shandong     | layer   | KF768000     | GX19NN05J  | Guangxi   | local   | MZ393174     |
| sdau1001   | Shandong     | layer   | JN389517     | GX19YL09J  | Guangxi   | local   | MZ393169     |
| sdau1002   | Shandong     | layer   | JN389518     | GX20YL05   | Guangxi   | local   | MW491266     |
| SDAU1005   | Shandong     | layer   | KF562375     | GX20YL09   | Guangxi   | local   | MW491270     |
| SDAU1102   | Shandong     | layer   | KU159178     | GX20YL12J  | Guangxi   | local   | MZ393181     |
| SX090912J  | Shanxi       | layer   | HQ386988     | GX20YL16J  | Guangxi   | local   | MZ393191     |
| SX090915J  | Shanxi       | layer   | HQ386989     | GX20YL40J  | Guangxi   | local   | MZ393185     |
| HB09-1     | Hebei        | layer   | HM600812     | GX20YL42J  | Guangxi   | local   | MZ393184     |
| 4817       | USA          | broiler | AF247385     | GX-J-4     | Guangxi   | local   | JQ246093     |
| 6683       | USA          | broiler | AF247387     | GX-J-6     | Guangxi   | local   | JQ246095     |

|            |           |         |          |            |           |       |          |
|------------|-----------|---------|----------|------------|-----------|-------|----------|
| 6803       | USA       | broiler | AF247389 | GX-J-7     | Guangxi   | local | JQ246096 |
| 10075-16   | USA       | broiler | GU222406 | GX-J-8     | Guangxi   | local | JQ246097 |
| 10075-20   | USA       | broiler | GU222407 | GX-J-10    | Guangxi   | local | JQ246099 |
| ADOL-7501  | USA       | broiler | AY027920 | GX-RJ01    | Guangxi   | local | MT119963 |
| AF88       | USA       | broiler | AF247390 | HB18XH01   | Hubei     | local | MN735298 |
| BJ0301     | Beijing   | broiler | AY897230 | HN17ZZ01   | Hunan     | local | MN735299 |
| CAUGX01    | Beijing   | broiler | JF931999 | HN17ZZ02   | Hunan     | local | MN735300 |
| GD13GZ     | Guangdong | broiler | KU500030 | JS13NT01   | Jiangsu   | local | MN735301 |
| GD1411-1   | Guangdong | broiler | KU500038 | JS14NT02   | Jiangsu   | local | MN735302 |
| GD1411-2   | Guangdong | broiler | KU500039 | JS16JH3    | Jiangsu   | local | MG700535 |
| GD1411-4   | Guangdong | broiler | KU500041 | JS16JH5    | Jiangsu   | local | MG700537 |
| GD16HZ02   | Guangdong | broiler | MT538252 | JS18YZ01   | Jiangsu   | local | MN735303 |
| GD16JM01   | Guangdong | broiler | MT538251 | LC110515-3 | Shandong  | local | GU982308 |
| GD17HZ01   | Guangdong | broiler | MT538238 | LC110515-4 | Shandong  | local | KC841153 |
| GD18JM01   | Guangdong | broiler | MT538241 | M180       | Guangdong | local | KX611834 |
| GD18SG01   | Guangdong | broiler | MT538242 | SH18JY01   | Shanghai  | local | MN735306 |
| GD18ZH01   | Guangdong | broiler | MT538243 | SH18JY02   | Shanghai  | local | MN735307 |
| GD19ZH02   | Guangdong | broiler | MT538249 | WN100401   | Anhui     | local | HQ271447 |
| GD19FS01   | Guangdong | broiler | MT538245 | WN100402   | Anhui     | local | HQ271448 |
| HB1801     | Hebei     | broiler | MN419352 | GD17FS01   | Guangdong |       | MN262599 |
| He1        | USA       | broiler | AF247391 | GD17FS03   | Guangdong |       | MN262601 |
| HPRS103    | UK        | broiler | Z46390   | GD18HZ12   | Guangdong |       | MN262610 |
| JL1801     | Jilin     | broiler | MN419348 | GD18HZ14   | Guangdong |       | MN262612 |
| JL1802     | Jilin     | broiler | MN419349 | GD18QY20   | Guangdong |       | MN262618 |
| JL1803     | Jilin     | broiler | MN419350 | GD19JY28   | Guangdong |       | MN262626 |
| JL1804     | Jilin     | broiler | MN419351 | HN1001-1   | Beijing   |       | HQ260974 |
| JS1805     | Jiangsu   | broiler | MN419339 | HN1001-2   | Beijing   |       | HQ260975 |
| JS1806     | Jiangsu   | broiler | MN419340 | HuB09-1    | Hubei     |       | HM600813 |
| JS1808     | Jiangsu   | broiler | MN419342 | HUB09WH02  | Hubei     |       | HQ634804 |
| JS-nt      | Jiangsu   | broiler | HM235667 | JGD18QY19  | Jiangxi   |       | MN262617 |
| LH20180301 | Shandong  | broiler | MK944404 | JGD18QY22  | Jiangxi   |       | MN262620 |
| LN1801     | Liaoning  | broiler | MN419354 | JS14XJ04   | Jiangsu   |       | MT783255 |
| NX0101     | Ningxia   | broiler | AY897227 | JS15LYJ01  | Jiangsu   |       | MT783269 |
| PDRC-59831 | USA       | broiler | KP284572 | JS16DJ01   | Jiangsu   |       | MT783276 |
| SD0001     | Shandong  | broiler | AY897223 | JS16JH2    | Jiangsu   |       | MG700534 |
| SD0002     | Shandong  | broiler | AY897224 | JX19AY10   | Jiangxi   |       | MN262549 |
| SD1802     | Shandong  | broiler | MN419336 | JX19AY11   | Jiangxi   |       | MN262550 |
| SD1803     | Shandong  | broiler | MN419337 | JX19AY17   | Jiangxi   |       | MN262556 |
| SD1804     | Shandong  | broiler | MN419338 | JX19AY27   | Jiangxi   |       | MN262566 |
| SD1809     | Shandong  | broiler | MN419346 | JX19DX02   | Jiangxi   |       | MN262570 |
| SD1810     | Shandong  | broiler | MN419344 | JX19DX19   | Jiangxi   |       | MN262587 |
| SD9902     | Shandong  | broiler | AY897221 | JX19GF05   | Jiangxi   |       | MN262587 |
| SDGM1801   | Shandong  | broiler | MN413674 | JX19TH06   | Jiangxi   |       | MN262533 |
| TJ1801     | Tianjing  | broiler | MN419353 | JX19TH07   | Jiangxi   |       | MN262534 |

UD2

USA

broiler

AF307949

JX19TH09

Jiangxi

MN262536

---

Abbreviation: ALV-J, Avian leukosis virus subgroup J.

<sup>1</sup> ALV-J isolate hosts: broiler, broiler chicken, layer: layer chicken, local: local chicken
